# Supplementary material for: Ovol2, a zinc finger transcription factor, is dispensable for spermatogenesis in mice
Source: Springer Nature journal article supplement (doi:10.1186/s12958-019-0542-3), 2019-11-23
Supplement: MOESM1 [file 17424298]

## Supplementary Figures

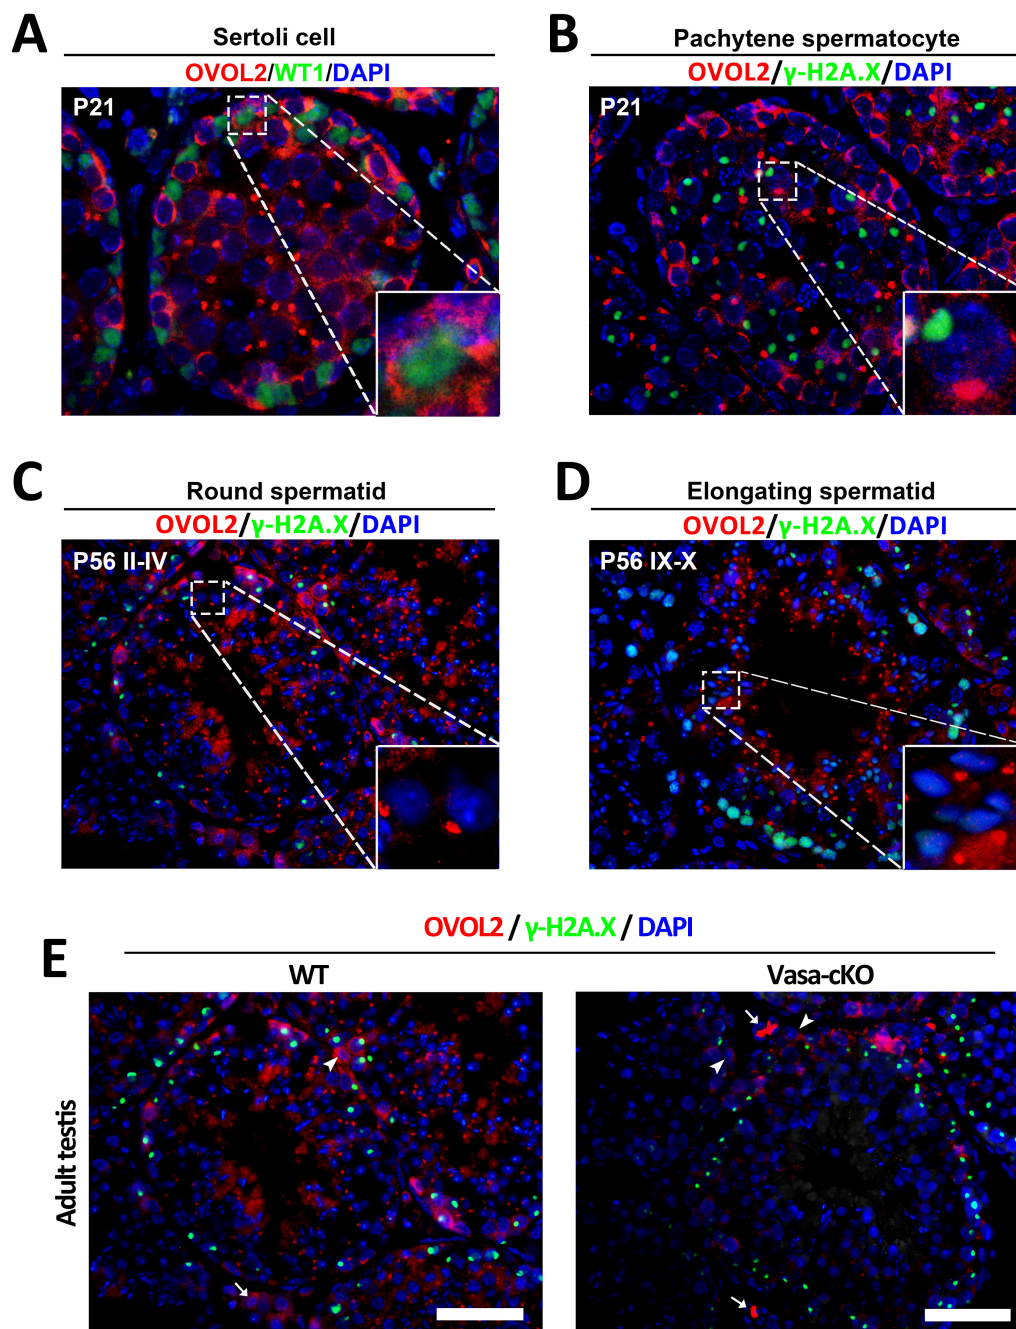

**Figure S1.** The localization of OVOL2 in mouse testicular sections was revealed by immunofluorescence. **(A)** Co-immunofluorescent staining for OVOL2 and WT1 (a Sertoli cell marker) antibodies on P21 WT testicular section showing OVOL2 expressed in Sertoli cells. Nuclei were stained with DAPI. **(B)** Co-immunofluorescent staining for OVOL2 and  $\gamma$ -H2A.X antibodies on P21 testicular section showing OVOL2 expressed in pachytene spermatocytes. Nuclei were stained with DAPI. **(C)** Co-

immunofluorescent staining for OVOL2 and  $\gamma$ -H2A.X antibodies on P56 testicular section showing OVOL2 expressed in round spermatids. Nuclei were stained with DAPI. **(D)** Co-immunofluorescent staining for OVOL2 and  $\gamma$ -H2A.X antibodies on P56 testicular section showing OVOL2 expressed in elongating spermatids. Nuclei were stained with DAPI. **(E)** Co-immunofluorescent staining for OVOL2 and  $\gamma$ -H2A.X antibodies on WT and Vasa-cKO (Vasa-cre; *Ovol2*<sup>lox/lox</sup>) testis sections at adulthood. Nuclei were stained with DAPI. Arrowheads indicate Sertoli cell; Arrows indicate Leydig cells. Scale bar bar=50 $\mu$ m.

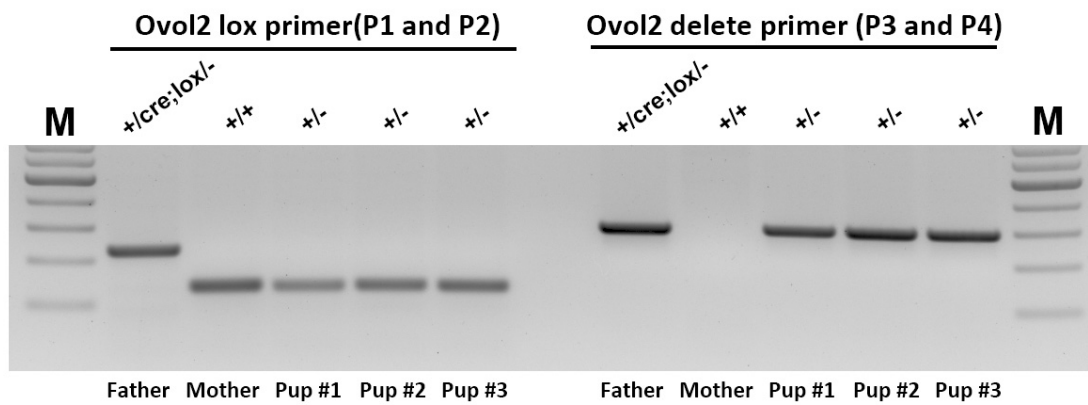

**Figure S2.** PCR based genotyping of the offspring derived from the Vasa-cKO (Vasa-cre; *Ovul2*<sup>lox/del</sup>) male breeding pairs. All pups are contains delete allele.
